# Supplementary material for: Harnessing Natural Diversity to Probe Metabolic Pathways
Source: PLOS journal article supplement (doi:10.1371/journal.pgen.0010080), 2005-12-27

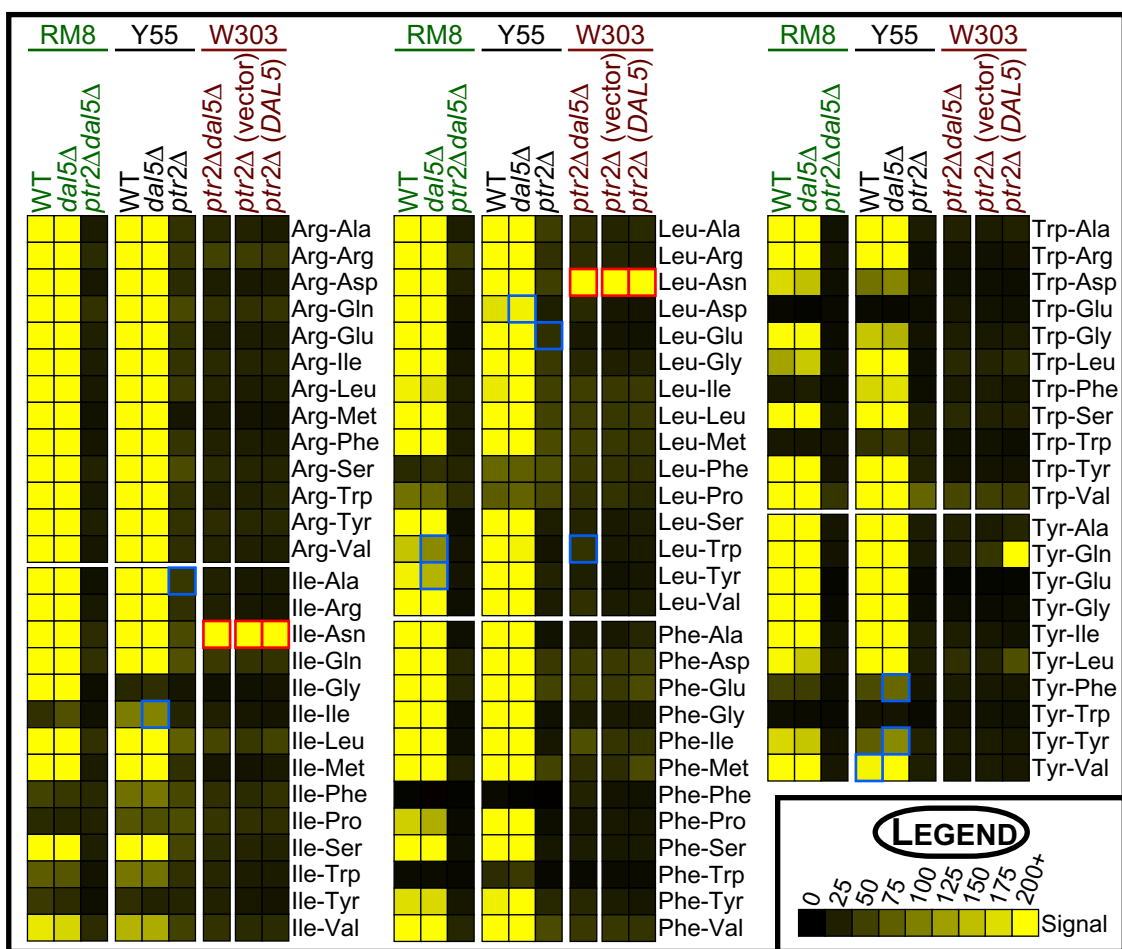

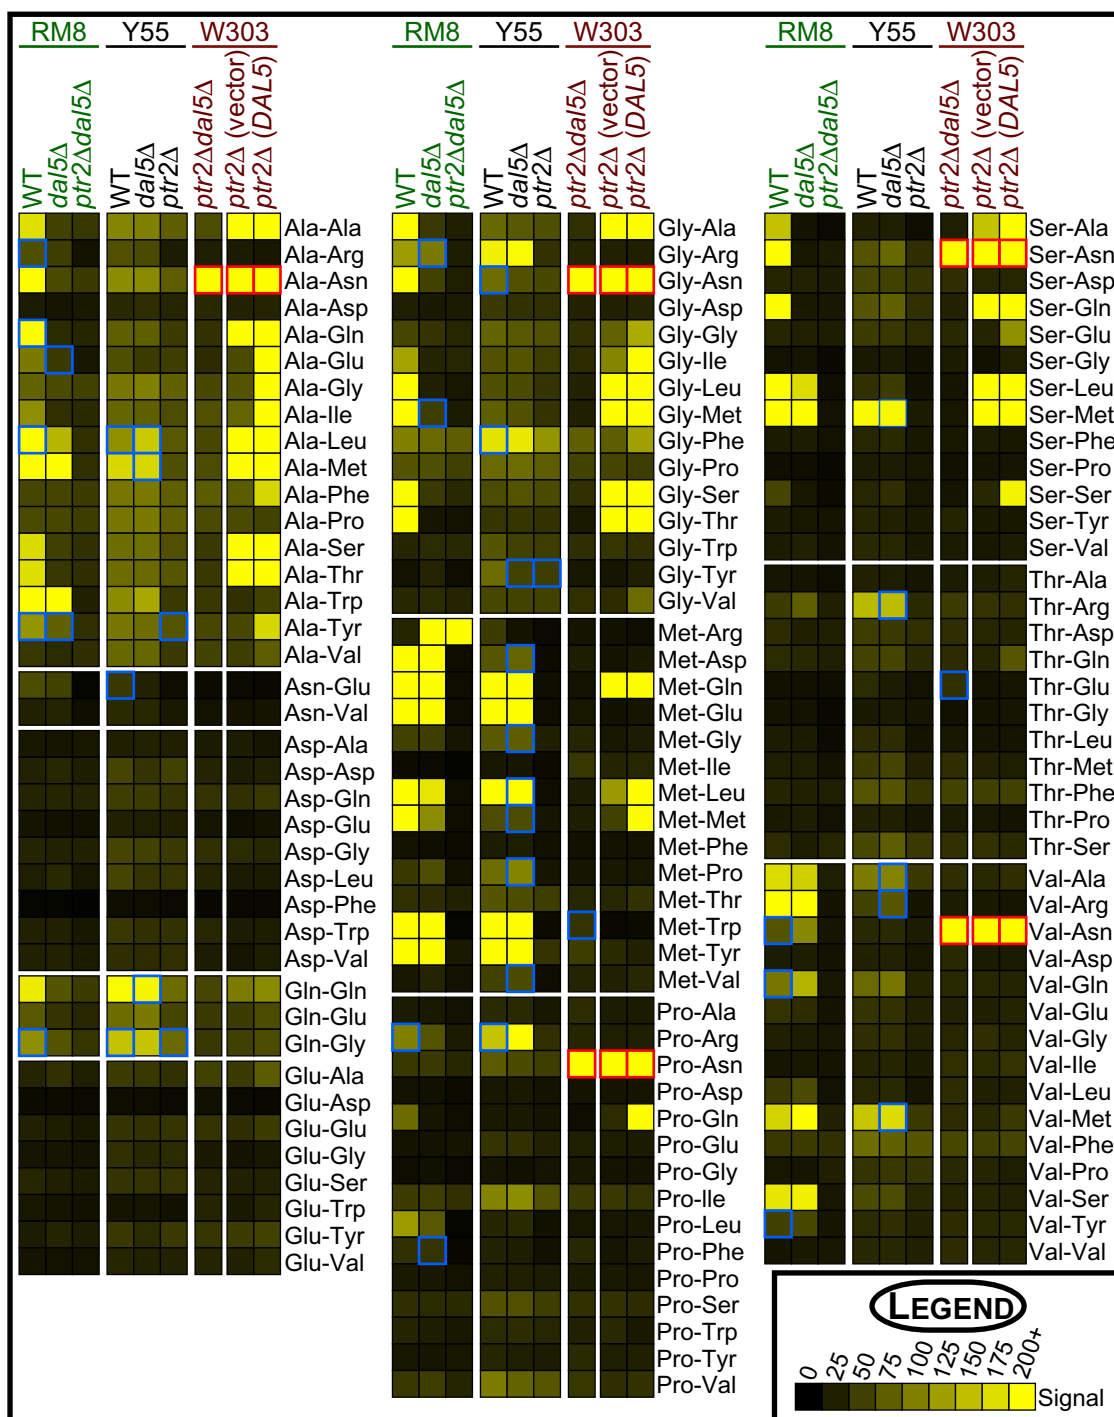

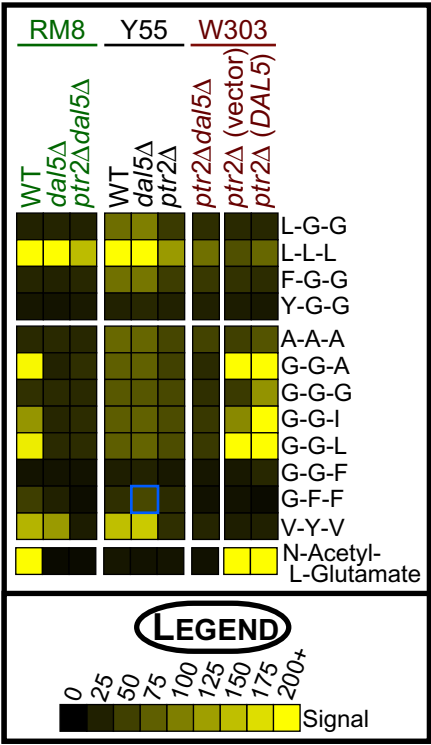

Supplement: S2 (10.1371/journal.pgen.0010080.s002) [file journal.pgen.0010080.sg002.pdf › journal.pgen.0010080.sg002.pdf]
